# Supplementary material
Source: PubMed Central journal article supplement (PMC8678210)
Supplement: NIHMS1742874-supplement-supinfo.pdf [file NIHMS1742874-supplement-supinfo.pdf]

# **Nut Consumption in Association with Overall Mortality and Recurrence/Disease Specific Mortality Among Long-Term Breast Cancer Survivors**

Cong Wang, Kai Gu, Fei Wang, Hui Cai, Wei Zheng, Pingping Bao, Xiao-Ou Shu

## **Table of Contents**

Supplementary Table 1. Characteristics of participants in the Shanghai Breast Cancer Survival Study by total energy intake level

**Supplemental Table 1. Characteristics of participants in the Shanghai Breast Cancer Survival Study by total energy intake level**

|                                       | Total energy intake            |                                | <i>P</i> -value |
|---------------------------------------|--------------------------------|--------------------------------|-----------------|
|                                       | ≤ Median <sup>a</sup> (n=1724) | > Median <sup>a</sup> (n=1725) |                 |
| Age at diagnosis (years)              | 54.24 (10.35)                  | 52.86 (9.08)                   | <0.001          |
| Time interval (diagnosis to survey)   | 5.318 (0.168)                  | 5.322 (0.171)                  | 0.455           |
| Total energy intake (Kcal/day)        | 1188 (174)                     | 1709 (269)                     | <0.001          |
| Education ≥ high school               | 50%                            | 56%                            | 0.001           |
| Income >1,000 yuan/month              | 40%                            | 45%                            | 0.003           |
| BMI (kg/m <sup>2</sup> )              | 24.09 (3.42)                   | 24.57 (3.64)                   | <0.001          |
| BMI > 25kg/m <sup>2</sup>             | 35%                            | 41%                            | 0.001           |
| Weight change during follow-up (kg)   | 0.5324 (5.1772)                | 1.192 (5.330)                  | <0.001          |
| TNM stage                             |                                |                                | 0.857           |
| I                                     | 38%                            | 37%                            |                 |
| II                                    | 50%                            | 52%                            |                 |
| III/IV                                | 7%                             | 6%                             |                 |
| Unknown                               | 5%                             | 5%                             |                 |
| ER                                    |                                |                                | 0.550           |
| Positive                              | 66%                            | 65%                            |                 |
| Negative                              | 33%                            | 34%                            |                 |
| Unknown                               | 1%                             | 1%                             |                 |
| PR                                    |                                |                                | 0.654           |
| Positive                              | 59%                            | 60%                            |                 |
| Negative                              | 39%                            | 39%                            |                 |
| Unknown                               | 1%                             | 1%                             |                 |
| Menopause ≤ 49.5 years                | 49%                            | 47%                            | 0.157           |
| Physical activity ≥ 7.5 MET-hour/week | 54%                            | 58%                            | 0.010           |
| Comorbidity                           | 49%                            | 44%                            | 0.003           |
| CHFP-2007 score                       | 33.44 (5.26)                   | 36.95 (4.64)                   | <0.001          |
| Soy food intake in dry weight (g/day) | 15.40 (12.06)                  | 26.26 (26.49)                  | <0.001          |
| Chemotherapy                          | 91%                            | 93%                            | 0.048           |
| Radiotherapy                          | 30%                            | 30%                            | 0.962           |
| Immunotherapy                         | 14%                            | 16%                            | 0.184           |
| Tamoxifen use                         | 53%                            | 54%                            | 0.825           |

Values are means (SD) for continuous variables; percentages for categorical variables;

Values of polytomous variables may not sum to 100% due to rounding;

BMI, body mass index; ER, estrogen receptor; PR, progesterone receptor; MET, metabolic equivalent of task; CHFP-2007, Chinese Food Pagoda 2007;

<sup>a</sup> Median of total energy intake=1429.75 kcal/day.
